# Supplementary material for: Evidence-Based Aerobic Exercise Training in Metabolic-Associated Fatty Liver Disease: Systematic Review with Meta-Analysis
Source: PubMed Central journal article supplement (PMC8069623; doi:10.3390/jcm10081659), 2021-04-13
Supplement: jcm-10-01659-s001.pdf [file jcm-10-01659-s001.pdf]

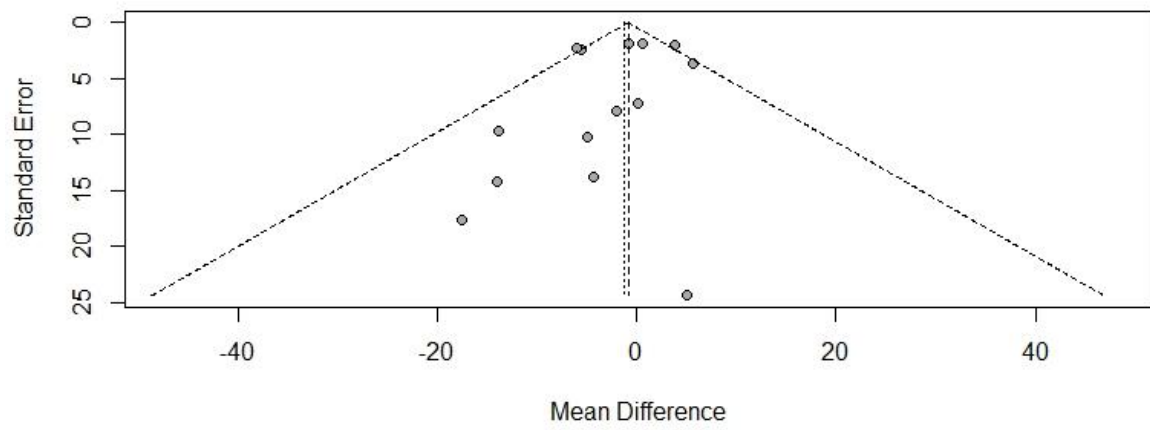

Figure S1. Changes in ALT level (Kendall's tau = -0.1868, p = 0.3880)

Table S1. Meta-regression analysis result

A. ALT Model Results:

| factor      | estimate | SE    | zval  | pval | ci.lb  | ci.ub |
|-------------|----------|-------|-------|------|--------|-------|
| time        | 5.51     | 2.73  | 2.02  | 0.04 | 0.15   | 10.86 |
| intensity   | -3.94    | 17.12 | -0.23 | 0.82 | -37.5  | 29.62 |
| volume      | 6.55     | 11.14 | 0.58  | 0.56 | -15.28 | 28.38 |
| progression | -4.26    | 13.90 | -0.31 | 0.76 | -31.51 | 23.00 |

B. AST Model Results:

| factor      | estimate | SE    | zval  | pval | ci.lb  | ci.ub |
|-------------|----------|-------|-------|------|--------|-------|
| time        | 4.98     | 5.28  | 0.94  | 0.34 | -5.36  | 15.33 |
| intensity   | -7.86    | 12.67 | -0.62 | 0.53 | -32.71 | 16.98 |
| progression | 4.40     | 12.54 | 0.36  | 0.73 | -20.20 | 28.98 |

C. GGT Model Results

| factor      | estimate | SE    | zval  | pval | ci.lb  | ci.ub |
|-------------|----------|-------|-------|------|--------|-------|
| intensity   | -5.31    | 27.00 | -0.20 | 0.84 | -58.25 | 47.63 |
| progression | 2.65     | 26.57 | 0.10  | 0.92 | -49.43 | 54.74 |

D. BMI Model Results:

| factor    | estimate | SE   | zval  | pval | ci.lb  | ci.ub |
|-----------|----------|------|-------|------|--------|-------|
| time      | 2.4      | 3.07 | 0.78  | 0.43 | -3.63  | 8.43  |
| intensity | 2.80     | 3.17 | 0.88  | 0.38 | -3.42  | 9.02  |
| volume    | -3.47    | 3.82 | -0.91 | 0.36 | -10.96 | 4.02  |

E. IHTG Model Results:

| factor | estimate | SE   | zval  | pval | ci.lb | ci.ub |
|--------|----------|------|-------|------|-------|-------|
| time   | -2.25    | 2.28 | -0.98 | 0.32 | -6.73 | 2.23  |
